# Supplementary material for: Cyanobacteria in lakes on Yungui Plateau, China are assembled via niche processes driven by water physicochemical property, lake morphology and watershed land-use
Source: PubMed Central journal article supplement (PMC5098255; doi:10.1038/srep36357), 2016-11-07
Supplement: srep36357-s1.pdf [file srep36357-s1.pdf]

## Supplementary information

Cyanobacteria in lakes on Yungui Plateau, China are assembled via niche processes driven by water physicochemical property, lake morphology and watershed

land-use Running title: Assembly mechanism of cyanobacteria

Jingqiu LIAO<sup>1#</sup>, Lei ZHAO<sup>2</sup>, Xiaofeng CAO<sup>1</sup>, Jinhua SUN<sup>3</sup>, Zhe GAO<sup>1</sup>, Jie WANG<sup>1</sup>, Dalin JIANG<sup>1</sup>, Hao FAN<sup>1</sup>, Yi HUANG<sup>1\*</sup>

1 State Key Joint Laboratory of Environmental Simulation and Pollution Control, College of Environmental Sciences and Engineering, Peking University, Beijing, 100871, China

2 Yunnan Key Laboratory of Pollution Process and Management of Plateau Lake – Watershed, Kunming, 650034, China

3 Chinese Research Academy of Environmental Sciences, Beijing, 100012, China

<sup>#</sup> Present address: Department of Microbiology, Cornell University, Ithaca, NY 14853, USA

\*Corresponding Author: College of Environmental Sciences and Engineering, Peking University, No. 5 Yiheyuan Road, Haidian District, Beijing, People's Republic of China 100871

E-mail: yhuang@pku.edu.cn

Fax number: +86 10 62757867

Table S1 The environmental variables data of the water samples from 21 plateau lakes

|                                        | DTH    | YH     | BLH    | QHH    | CQH    | CH     | XH     | NPH    | CHSD   | LSH    | HFSD   | PZH    | SJH    | SDH   | WBH    | JH     | TC    | CBH    | BTH   | HXH   | QSH    |
|----------------------------------------|--------|--------|--------|--------|--------|--------|--------|--------|--------|--------|--------|--------|--------|-------|--------|--------|-------|--------|-------|-------|--------|
| Water physicochemical variables        |        |        |        |        |        |        |        |        |        |        |        |        |        |       |        |        |       |        |       |       |        |
| Chl-a (mg/m <sup>3</sup> )             | 29.18  | 8.10   | 7.37   | 2.67   | 8.61   | 6.72   | 3.11   | 1.68   | 1.69   | 1.23   | 10.60  | 10.33  | 18.83  | 4.75  | 0.11   | 1.94   | 0.05  | 0.40   | 11.68 | 1.00  | 1.01   |
| NH <sub>4</sub> <sup>+</sup> -N (mg/L) | 0.06   | 0.10   | 0.02   | 0.29   | 0.06   | 0.02   | 0.32   | 0.45   | 0.02   | 0.05   | 0.14   | 0.15   | 0.08   | 0.21  | 0.03   | 0.12   | 0.09  | 0.01   | 0.05  | 0.01  | 0.01   |
| NO <sub>3</sub> -N (mg/L)              | 0.25   | 0.06   | 0.55   | 0.13   | 1.53   | 0.14   | 0.01   | 0.18   | 0.02   | 0.04   | 0.08   | 0.09   | 0.04   | 0.01  | 0.01   | 0.02   | 0.02  | 0.01   | 0.03  | 0.01  | 0.81   |
| TKN (mg/L)                             | 0.31   | 0.12   | 0.58   | 0.41   | 1.61   | 0.18   | 0.32   | 0.96   | 0.03   | 0.07   | 0.22   | 0.30   | 0.10   | 0.23  | 0.04   | 0.09   | 0.07  | 0.03   | 0.07  | 0.03  | 0.83   |
| TN (mg/L)                              | 1.14   | 0.20   | 0.65   | 0.97   | 2.00   | 0.21   | 0.49   | 1.24   | 0.06   | 0.11   | 0.28   | 0.63   | 0.47   | 0.29  | 0.05   | 0.24   | 0.19  | 0.03   | 0.09  | 0.03  | 0.87   |
| SRP (mg/L)                             | 0.02   | 0.01   | 0.00   | 0.02   | 0.01   | 0.00   | 0.04   | 0.02   | 0.01   | 0.01   | 0.01   | 0.00   | 0.00   | 0.01  | 0.01   | 0.01   | 0.01  | 0.00   | 0.02  | 0.00  | 0.01   |
| TP (mg/L)                              | 0.10   | 0.03   | 0.01   | 0.12   | 0.02   | 0.01   | 0.07   | 0.11   | 0.01   | 0.02   | 0.02   | 0.04   | 0.04   | 0.02  | 0.02   | 0.05   | 0.03  | 0.01   | 0.07  | 0.01  | 0.02   |
| CODmn (mg/L)                           | 8.00   | 3.58   | 1.20   | 9.27   | 5.88   | 4.35   | 8.69   | 5.49   | 2.54   | 4.98   | 5.03   | 6.91   | 5.96   | 5.67  | 3.62   | 4.40   | 3.99  | 2.30   | 4.17  | 2.98  | 1.72   |
| Trophic status index                   | 61.91  | 44.43  | 39.65  | 39.63  | 49.26  | 41.50  | 42.13  | 37.99  | 29.98  | 30.09  | 47.72  | 50.67  | 55.28  | 41.37 | 10.86  | 36.19  | 6.56  | 16.17  | 47.87 | 23.91 | 27.24  |
| Salinity (‰)                           | 326.26 | 70.55  | 105.13 | 257.57 | 222.03 | 90.83  | 217.07 | 113.12 | 105.22 | 96.50  | 82.32  | 94.54  | 181.22 | 22.28 | 84.55  | 135.23 | 39.06 | 133.83 | 38.37 | 95.28 | 52.65  |
| pH                                     | 7.32   | 8.89   | 8.49   | 6.97   | 9.41   | 9.34   | 7.72   | 7.55   | 8.32   | 9.44   | 10.11  | 8.85   | 7.26   | 7.57  | 9.06   | 8.22   | 8.01  | 8.43   | 7.84  | 8.76  | 8.99   |
| DO (mg/L)                              | 13.40  | 2.69   | 7.50   | 6.97   | 8.13   | 8.19   | 2.03   | 3.90   | 8.59   | 9.60   | 8.37   | 8.51   | 7.30   | 5.19  | 6.47   | 6.07   | 5.77  | 6.54   | 6.31  | 7.08  | 8.01   |
| Temperature (°C)                       | 22.03  | 24.00  | 24.57  | 23.27  | 28.67  | 18.37  | 22.00  | 25.40  | 27.87  | 14.57  | 20.53  | 21.67  | 26.07  | 19.33 | 21.60  | 21.00  | 16.63 | 14.93  | 15.67 | 19.23 | 21.90  |
| SD (m)                                 | 0.37   | 2.00   | 3.50   | 9.94   | 0.98   | 2.77   | 1.28   | 1.15   | 1.43   | 2.00   | 1.78   | 1.00   | 0.50   | 2.33  | 1.32   | 0.79   | 1.92  | 3.65   | 1.60  | 2.90  | 2.83   |
| Lake morphologic variable              |        |        |        |        |        |        |        |        |        |        |        |        |        |       |        |        |       |        |       |       |        |
| Area (km <sup>2</sup> )                | 10.98  | 0.90   | 3.24   | 3.41   | 10.24  | 0.90   | 3.27   | 14.98  | 0.61   | 7.62   | 1.99   | 5.50   | 2.30   | 1.44  | 2.20   | 4.81   | 1.16  | 8.39   | 1.69  | 3.84  | 5.21   |
| Watershed land-use variables           |        |        |        |        |        |        |        |        |        |        |        |        |        |       |        |        |       |        |       |       |        |
| Agricultural land (%)                  | 45     | 35     | 42     | 41     | 58     | 9      | 28     | 4      | 25     | 26     | 29     | 52     | 51     | 0     | 6      | 18     | 0     | 24     | 0     | 16    | 36     |
| Forest land (%)                        | 16     | 51     | 42     | 43     | 11     | 72     | 50     | 68     | 45     | 64     | 63     | 27     | 21     | 62    | 76     | 69     | 89    | 51     | 87    | 67    | 44     |
| Grass land (%)                         | 10     | 3      | 1      | 4      | 3      | 1      | 15     | 18     | 15     | 3      | 2      | 2      | 9      | 29    | 13     | 9      | 3     | 18     | 3     | 13    | 10     |
| Water body (%)                         | 7      | 2      | 2      | 3      | 8      | 18     | 2      | 1      | 1      | 5      | 2      | 4      | 3      | 8     | 5      | 1      | 8     | 3      | 9     | 2     | 5      |
| Urban land (%)                         | 15     | 2      | 2      | 8      | 17     | 0      | 5      | 3      | 4      | 2      | 1      | 3      | 8      | 0     | 0      | 2      | 0     | 4      | 0     | 1     | 3      |
| Barren land (%)                        | 6      | 7      | 11     | 1      | 3      | 0      | 1      | 6      | 11     | 1      | 4      | 12     | 9      | 1     | 0      | 1      | 0     | 0      | 1     | 0     | 2      |
| Lake geographic location               |        |        |        |        |        |        |        |        |        |        |        |        |        |       |        |        |       |        |       |       |        |
| Longitude (E)                          | 103.31 | 103.45 | 103.99 | 100.60 | 103.36 | 103.71 | 100.04 | 99.64  | 100.24 | 100.14 | 103.63 | 104.09 | 103.30 | 99.95 | 100.19 | 99.93  | 99.28 | 99.94  | 99.99 | 99.96 | 103.11 |
| Latitude (N)                           | 23.43  | 24.84  | 24.14  | 25.44  | 23.44  | 24.58  | 26.02  | 27.88  | 26.23  | 26.88  | 25.75  | 24.16  | 23.59  | 27.91 | 27.06  | 26.49  | 25.87 | 26.16  | 27.82 | 26.28 | 25.60  |
| Altitude (m)                           | 1280   | 1908   | 1494   | 1975   | 1283   | 1889   | 1965   | 3266   | 2192   | 2438   | 1954   | 1445   | 1273   | 3612  | 3078   | 2186   | 2555  | 2050   | 3541  | 2130  | 2172   |

Table S2 Pearson's correlation matrix of eutrophication index

|       | Chl-a  | TP      | TN    | SD    | CODmn |
|-------|--------|---------|-------|-------|-------|
| Chl-a | 1.000  |         |       |       |       |
| TP    | 0.302  | 1.000   |       |       |       |
| TN    | 0.313  | 0.408   | 1.000 |       |       |
| SD    | -0.323 | 0.204   | 0.032 | 1.000 |       |
| CODmn | 0.386  | 0.702** | 0.412 | 0.126 | 1.000 |

\*\* . Significantly correlated at 0.01 level(bilateral)

Table S3 Freshwater cyanobacteria identified at genus level in the 21 plateau lakes

| Taxon* | <i>Synechococcus</i> | <i>Gloeobacter</i> | <i>Oscillatoria</i> | <i>Planktothrix</i> | <i>Microcystis</i> | <i>Phormidium</i> | <i>Leptolyngbya</i> | <i>Nostoc</i> | <i>Pseudanabaena</i> | <i>Limnothrix</i> |
|--------|----------------------|--------------------|---------------------|---------------------|--------------------|-------------------|---------------------|---------------|----------------------|-------------------|
| DTH    | 0.00                 | 0.32               | 3.47                | 0.00                | 0.00               | 2.12              | 13.64               | 8.71          | 0.42                 | 0.00              |
| YH     | 23.08                | 0.00               | 0.00                | 0.00                | 0.00               | 0.00              | 0.00                | 0.00          | 0.00                 | 0.00              |
| BLH    | 97.06                | 0.00               | 0.00                | 0.00                | 0.37               | 0.00              | 0.00                | 0.00          | 0.00                 | 0.00              |
| QHH    | 33.33                | 0.00               | 0.00                | 0.00                | 33.33              | 0.00              | 0.00                | 0.00          | 0.00                 | 0.00              |
| CQH    | 73.13                | 0.00               | 0.00                | 0.00                | 1.49               | 0.00              | 0.00                | 0.00          | 0.00                 | 0.00              |
| CH     | 87.80                | 0.00               | 0.00                | 0.00                | 0.00               | 2.44              | 0.00                | 0.00          | 0.00                 | 0.00              |
| XH     | 30.28                | 0.00               | 0.00                | 8.14                | 2.04               | 0.00              | 0.00                | 0.00          | 0.51                 | 1.02              |
| NPH    | 0.00                 | 0.00               | 0.00                | 0.00                | 0.00               | 0.00              | 0.00                | 0.00          | 0.00                 | 0.00              |
| CHSD   | 12.50                | 0.00               | 0.00                | 0.00                | 0.00               | 0.00              | 0.00                | 0.00          | 0.00                 | 0.00              |
| LSH    | 25.00                | 0.00               | 0.00                | 0.00                | 0.00               | 0.00              | 0.00                | 0.00          | 0.00                 | 0.00              |
| HFSD   | 0.00                 | 0.00               | 0.00                | 0.00                | 66.67              | 0.00              | 0.00                | 0.00          | 0.00                 | 0.00              |
| PZH    | 92.73                | 0.00               | 0.00                | 0.00                | 0.00               | 0.00              | 0.00                | 0.00          | 0.00                 | 0.00              |
| SJH    | 57.14                | 0.00               | 0.00                | 0.00                | 0.00               | 0.00              | 0.00                | 0.00          | 0.00                 | 0.00              |
| SDH    | 82.33                | 0.00               | 0.00                | 0.00                | 0.00               | 0.00              | 0.00                | 0.00          | 0.00                 | 0.00              |
| WBH    | 65.57                | 0.00               | 0.00                | 0.00                | 0.00               | 0.00              | 1.64                | 0.00          | 0.00                 | 0.00              |
| JH     | 2.96                 | 0.00               | 0.00                | 0.00                | 0.23               | 0.00              | 0.00                | 0.00          | 0.00                 | 0.00              |
| TC     | 79.90                | 0.00               | 0.00                | 0.00                | 0.00               | 0.00              | 0.00                | 0.00          | 0.00                 | 0.00              |
| CBH    | 93.22                | 0.00               | 0.00                | 0.00                | 0.00               | 0.00              | 0.00                | 0.00          | 0.00                 | 0.00              |
| BTH    | 50.68                | 0.00               | 0.00                | 0.00                | 0.00               | 0.00              | 0.00                | 0.00          | 0.00                 | 0.00              |
| HXH    | 51.72                | 0.00               | 0.00                | 0.00                | 10.34              | 0.00              | 0.00                | 0.00          | 0.00                 | 0.00              |
| QSH    | 70.59                | 0.00               | 0.00                | 0.00                | 1.96               | 0.00              | 0.00                | 0.00          | 0.00                 | 0.00              |

\* Percent of total number of sequence reads with cyanobacterial origin

Table S4 Pearson's correlation matrix of *Synechococcus* and abiotic environmental variables

|                   | <i>Synechococcus</i> |
|-------------------|----------------------|
| Chl-a             | 0.004                |
| NH3               | -0.151               |
| NO3               | 0.206                |
| TKN               | 0.143                |
| TN                | 0.045                |
| PO4               | -0.222               |
| TP                | -0.239               |
| CODmn             | -0.366               |
| Salinity          | -0.115               |
| pH                | -0.017               |
| DO                | -0.015               |
| Temperature       | 0.120                |
| SD                | 0.135                |
| Area              | -0.128               |
| Agricultural land | 0.119                |
| Forest land       | -0.061               |
| Grass land        | -0.177               |
| Water body        | -0.067               |
| Urban land        | -0.136               |
| Barren land       | 0.334                |

Table S5 Pearson's correlation matrix of physicochemical variables

|                                 | Chl-a  | NH <sub>4</sub> <sup>+</sup> -N | NO <sub>3</sub> -N | TKN     | TN      | SRP     | TP       | CODmn   | Salinity | pH     | DO     | Temperature | SD    |
|---------------------------------|--------|---------------------------------|--------------------|---------|---------|---------|----------|---------|----------|--------|--------|-------------|-------|
| Chl-a                           | 1.000  |                                 |                    |         |         |         |          |         |          |        |        |             |       |
| NH <sub>4</sub> <sup>+</sup> -N | -0.118 | 1.000                           |                    |         |         |         |          |         |          |        |        |             |       |
| NO <sub>3</sub> -N              | 0.101  | -0.173                          | 1.000              |         |         |         |          |         |          |        |        |             |       |
| TKN                             | 0.044  | 0.255                           | 0.896**            | 1.000   |         |         |          |         |          |        |        |             |       |
| TN                              | 0.313  | 0.328                           | 0.793**            | 0.918** | 1.000   |         |          |         |          |        |        |             |       |
| SRP                             | 0.084  | 0.655**                         | -0.109             | 0.136   | 0.233   | 1.000   |          |         |          |        |        |             |       |
| TP                              | 0.302  | 0.699**                         | -0.151             | 0.151   | 0.408   | 0.685** | 1.000    |         |          |        |        |             |       |
| CODmn                           | 0.386  | 0.621**                         | -0.078             | 0.133   | 0.412   | 0.633** | 0.702**  | 1.000   |          |        |        |             |       |
| Salinity                        | 0.494* | 0.195                           | 0.243              | 0.286   | 0.575** | 0.406   | 0.541*   | 0.651** | 1.000    |        |        |             |       |
| pH                              | -0.227 | -0.469*                         | 0.282              | 0.092   | -0.142  | -0.386  | -0.663** | -0.442* | -0.393   | 1.000  |        |             |       |
| DO                              | 0.512* | -0.521*                         | 0.233              | 0.029   | 0.194   | -0.302  | -0.058   | 0.024   | 0.330    | 0.180  | 1.000  |             |       |
| Temperature                     | 0.212  | 0.219                           | 0.470*             | 0.555** | 0.596** | 0.099   | 0.157    | 0.139   | 0.391    | -0.135 | -0.032 | 1.000       |       |
| SD                              | -0.323 | 0.154                           | -0.031             | -0.004  | 0.032   | -0.064  | 0.204    | 0.126   | 0.142    | -0.209 | -0.058 | -0.098      | 1.000 |

\*\* . Significantly correlated at 0.01 level(bilateral)

\*. Significantly correlated at 0.05 level(bilateral)

Table S6 Pearson's correlation matrix of anthropogenic geographic variables

|                   | Agricultural land | Forest land | Grass land | Water body | Urban land | Barren land |
|-------------------|-------------------|-------------|------------|------------|------------|-------------|
| Agricultural land | 1.000             |             |            |            |            |             |
| Forest land       | -0.921**          | 1.000       |            |            |            |             |
| Grass land        | -0.389            | 0.083       | 1.000      |            |            |             |
| Water body        | -0.251            | 0.172       | -0.219     | 1.000      |            |             |
| Urban land        | 0.710**           | -0.823**    | -0.087     | -0.002     | 1.000      |             |
| Barren land       | 0.549*            | -0.565**    | -0.187     | -0.360     | 0.206      | 1.000       |

\*\* . Significantly correlated at 0.01 level(bilateral)

\* . Significantly correlated at 0.05 level(bilateral)
